# Supplementary material for: Global health actors no longer in favor of user fees: a documentary study
Source: Global Health. 2013 Jul 26;9:29. doi: 10.1186/1744-8603-9-29 (PMC3750575; doi:10.1186/1744-8603-9-29)
Supplement: Additional file 2 — Characteristics of the positive or nuanced stance of GHAs. [file 1744-8603-9-29-S2.pdf]

## CHARACTERISTICS OF THE POSITIVE OR NUANCED STANCE OF GHAs

| GHAs*                                                        | Suggested measure                                           | Targeted populations          | Targeted services                       | Combination or other                                                    |
|--------------------------------------------------------------|-------------------------------------------------------------|-------------------------------|-----------------------------------------|-------------------------------------------------------------------------|
| <b>International governmental organizations (IGOs) (n=8)</b> |                                                             |                               |                                         |                                                                         |
| <b>African Union</b><br>(n=2)                                | Other financing scheme [1]                                  | -                             | -                                       | -                                                                       |
|                                                              | User fee exemption / abolition + other financing scheme [2] | -                             | -                                       | -                                                                       |
| <b>CEU (n=3)</b>                                             | (Universal) free access / free care [3]                     | -                             | HIV/AIDS prevention, treatment and care | -                                                                       |
|                                                              | Other financing scheme [4]                                  | -                             | -                                       | Essential health services for vulnerable populations                    |
|                                                              | (Universal) free access / free care [5]                     | -                             | Basic health care                       | -                                                                       |
| <b>ECHO (n=1)</b>                                            | User fee exemption / abolition [6]                          | -                             | -                                       | During humanitarian emergencies                                         |
| <b>European Commission</b><br>(n=1)                          | (Universal) free access / free care [7]                     | -                             | -                                       | HIV/AIDS prevention, treatment and care for pregnant women              |
| <b>International Labour Office</b><br>(n=5)                  | Other financing scheme [8]                                  | Women                         | -                                       | -                                                                       |
|                                                              | Other financing scheme [9-11]                               | -                             | -                                       | -                                                                       |
|                                                              | (Universal) free access / free care [12]                    | -                             | -                                       | Pre-natal and post-natal care, childbirth, hospitalizations for mothers |
| <b>World Health Assembly</b> (n=1)                           | Other financing scheme [13]                                 | -                             | -                                       | -                                                                       |
| <b>The World Bank</b> (n=2)                                  | User fee exemption / abolition [14]                         | Vulnerable / poor populations | -                                       | -                                                                       |
|                                                              | (Universal) free access / free care [15]                    | Mothers and children          | -                                       | -                                                                       |
| <b>WHO (n=2)</b>                                             | Other financing scheme [16, 17]                             | -                             | Primary health care                     | -                                                                       |
| <b>Government agencies (GAs) (n=3)</b>                       |                                                             |                               |                                         |                                                                         |
| <b>Denmark (n=1)</b>                                         | Other financing scheme [18]                                 | -                             | -                                       | Primary health care for children and pregnant women                     |
| <b>Germany (n=1)</b>                                         | (Universal) free access / free care [19]                    | -                             | HIV/AIDS prevention, treatment and care | -                                                                       |

| <b>GHA*</b>                                                              | <b>Suggested measure</b>                     | <b>Targeted populations</b>           | <b>Targeted services</b>        | <b>Combination or other</b>                |
|--------------------------------------------------------------------------|----------------------------------------------|---------------------------------------|---------------------------------|--------------------------------------------|
| <b>United Kingdom (n=3)</b>                                              | User fee exemption / abolition [20]          | Women + Children                      | -                               | -                                          |
|                                                                          | User fee exemption / abolition [21]          | -                                     | Basic health care               | -                                          |
|                                                                          | User fee exemption / abolition [22]          | -                                     | Essential health care           | -                                          |
| <b><i>International non-governmental organizations (INGOs) (n=6)</i></b> |                                              |                                       |                                 |                                            |
| <b>MDM (n=1)</b>                                                         | User fee exemption / abolition [23]          | -                                     | Primary health care             | -                                          |
| <b>Merlin (n=3)</b>                                                      | Other financing scheme [24]                  | -                                     | Basic health care               | -                                          |
|                                                                          | Other financing scheme [25]                  | Mothers                               | -                               | -                                          |
|                                                                          | Other financing scheme [26]                  | Mothers and children                  | -                               | -                                          |
| <b>MSF (n=2)</b>                                                         | (Universal) free access / free care [27]     | -                                     | Malaria diagnosis and treatment | -                                          |
|                                                                          | (Universal) free access / free care [28]     | -                                     | -                               | -                                          |
| <b>Oxfam (n=3)</b>                                                       | User fee exemption / abolition [29, 30]      | -                                     | -                               | -                                          |
|                                                                          | (Universal) free access / free care [31]     | -                                     | Basic health care               | -                                          |
| <b>Save the Children (n=10)</b>                                          | Other financing scheme [32]                  | Mothers and children                  | -                               | -                                          |
|                                                                          | (Universal) free access / free care [33, 34] | Mothers and children                  | -                               | -                                          |
|                                                                          | (Universal) free access / free care [35, 36] | Children                              | -                               | -                                          |
|                                                                          | User fee exemption / abolition [37]          | Children                              | -                               | -                                          |
|                                                                          | User fee exemption / abolition [38-40]       | -                                     | -                               | -                                          |
|                                                                          | (Universal) free access / free care [41]     | -                                     | Essential health care           | -                                          |
| <b>World Vision (n=2)</b>                                                | (Universal) free access / free care [42]     | Mothers and children                  | -                               | -                                          |
|                                                                          | (Universal) free access / free care [43]     | -                                     | -                               | Minimum package of healthcare for children |
| <b><i>Networks and working groups (NW/WGs) (n=14)</i></b>                |                                              |                                       |                                 |                                            |
| <b>Action for Global Health (n=5)</b>                                    | User fee exemption / abolition [44, 45]      | Women + Vulnerable / poor populations | -                               | -                                          |

| <b>GHA*</b>                                  | <b>Suggested measure</b>                                          | <b>Targeted populations</b>   | <b>Targeted services</b>             | <b>Combination or other</b>                  |
|----------------------------------------------|-------------------------------------------------------------------|-------------------------------|--------------------------------------|----------------------------------------------|
|                                              | (Universal) free access / free care [46]                          | -                             | -                                    | Basic healthcare for children                |
|                                              | (Universal) free access / free care [47]                          | Vulnerable / poor populations | Primary health care                  | -                                            |
|                                              | (Universal) free access / free care [48]                          | -                             | -                                    | -                                            |
| <b>AMCP-F (n=1)</b>                          | User fee exemption / abolition + other financing scheme [49]      | -                             | Basic healthcare + Long-term illness | -                                            |
| <b>Commission for Africa (n=2)</b>           | User fee exemption / abolition [50]                               | -                             | Basic healthcare                     | -                                            |
|                                              | User fee exemption / abolition [51]                               | -                             | -                                    | -                                            |
| <b>Coordination Sud (n=2)</b>                | User fee exemption / abolition [52]                               | Mothers and children          | -                                    | -                                            |
|                                              | User fee exemption / abolition [53]                               | Vulnerable / poor populations | -                                    | -                                            |
| <b>Countdown to 2015 (n=1)</b>               | (Universal) free access / free care + other financing scheme [54] | Mothers and children          | -                                    | -                                            |
| <b>G8 (n=2)</b>                              | (Universal) free access / free care + other financing scheme [55] | -                             | -                                    | Basic healthcare for children                |
|                                              | (Universal) free access / free care [56]                          | Mothers and children          | -                                    | -                                            |
| <b>GHW (n=1)</b>                             | User fee exemption / abolition [57]                               | -                             | Essential health care                | -                                            |
| <b>UNAIDS (n=1)</b>                          | User fee exemption / abolition [58]                               | Mothers                       | -                                    | HIV prevention, treatment and care for women |
| <b>MDG Africa Steering Group (n=1)</b>       | User fee exemption / abolition [59]                               | -                             | Essential health care                | -                                            |
| <b>PHM (n=1)</b>                             | (Universal) free access / free care [60]                          | -                             | Primary health care                  | -                                            |
| <b>Takemi WG (n=1)</b>                       | User fee exemption / abolition [61]                               | -                             | -                                    | -                                            |
| <b>TF on IIFHS (n=1)</b>                     | (Universal) free access / free care [62]                          | -                             | -                                    | -                                            |
| <b>Global Campaign for Health MDGs (n=1)</b> | (Universal) free access / free care [63]                          | Vulnerable / poor populations | -                                    | -                                            |
| <b>UN Millennium Project (n=2)</b>           | User fee exemption / abolition [64, 65]                           | -                             | Basic healthcare                     | -                                            |

*\*The list of abbreviations is available in the article.*

## References

1. African Union: *The new partnership for Africa's development (NEPAD): health strategy*. Addis Ababa; 2007.
2. African Union: *Africa Health Strategy: 2007-2015*. Addis Ababa; 2007.
3. Council of the European Union: *The EU as a global partner for pro-poor and pro-growth development: EU Agenda for Action on MDGs*. Brussels; 2008.
4. Council of the European Union: *Council conclusions on the EU role in Global Health*. Brussels; 2010.
5. Council of the European Union: *Council Conclusions on the promotion and protection of the rights of the child in the European Union's external action - the development and humanitarian dimensions*. Brussels; 2008.
6. ECHO: *DG ECHO position paper on user fees for primary health services in humanitarian crises*. Brussels; 2009.
7. Commission of the European Communities: *A European Programme for Action to Confront HIV/AIDS, Malaria and Tuberculosis through External Action (2007-2011)*. Brussel; 2005.
8. International Labour Organization: *Safe maternity and the world of work*. Geneva; 2007.
9. International Labour Organization: *Social health protection: An ILO strategy towards universal access to health care (a consultation)*. Geneva; 2007.
10. International Labour Office: *Extending social security to all: A guide through challenges and options*. Geneva; 2010.
11. International Labour Organization: *World social security report*. Geneva; 2010.
12. International Labour Office: *Achieving MDG 5 through decent work*. Geneva; 2010.
13. Sixty-fourth World Health Assembly: *Sustainable health financing structures and universal coverage*. New York; 2011.
14. The World Bank: *Healthy development: The World Bank strategy for health, nutrition and population results*. Washington; 2007.
15. The World Bank: *The World Bank's reproductive health action plan 2010-2015*. Washington; 2010.
16. World Health Organization: *The world health report 2008: Primary health care now more than ever*. Geneva; 2008.

17. World Health Organization: *Health systems financing: The path to universal coverage. The World Health Report*. Geneva; 2010.
18. Ministry of Foreign Affairs of Denmark: *Health and development: A guidance note to Danish development assistance to health*. Copenhagen; 2009.
19. Federal Ministry for Economic Cooperation and Development: *Promoting Health - Fighting HIV / AIDS*. Berlin; 2007.
20. Department for International Development: *Eliminating World Poverty: Building Our Common Future*. London; 2009.
21. Department for International Development: *Eliminating world poverty. Making governance work for the poor. A white paper on international development*. London; 2006.
22. Department for International Development: *Working together for better health*. London; 2007.
23. Médecins du Monde: *L'accès gratuit aux soins de santé primaire : Une stratégie payante. Appel au G8*. Paris; 2008.
24. Merlin: *Merlin's role in health financing*. London; 2007.
25. Merlin: *All mothers matter. Investing in health sector to save lives in fragile states*. London; 2009.
26. Merlin: *Merlin response to Choice for Women: Wanted pregnancies, safe births*. London; 2010.
27. Médecins Sans Frontières: *Full prescription. Better malaria treatment for more people, MSF's experience*. Brussels; 2008.
28. Médecins Sans Frontières: *No cash, no care: How "user fees" endanger health. An MSF briefing paper on financial barriers to healthcare*. Brussels; 2008.
29. Oxfam International: *In the public interest: Health, education, and water and sanitation for all*. Oxford; 2006.
30. Oxfam International: *Blind optimism: Challenging the myths about private health care in poor countries*. Oxford; 2009.
31. Oxfam International: *If not now, when?* Oxford; 2008.
32. Save the Children UK: *The interdependence of maternal, newborn and child health*. London; 2010.
33. Save the Children UK: *Save the Children's calls to the G8 and G20 in 2010*. London; 2010.

34. Save the Children UK: *Child survival: What the UK government must do in 2010*. London; 2010.
35. Save the Children UK: *No child born to die: Closing the gaps*. London; 2011.
36. Save the Children UK: *Killer bills: Make child poverty history - abolish user fees*. London; 2005.
37. Save the Children UK: *Saving children's lives: Why equity matters*. London; 2008.
38. Save the Children UK: *Health user fees - The case against*. London; 2009.
39. Save the Children UK: *The cost of coping with illness*. London; 2005.
40. Save the Children UK: *Paying with their lives: The cost of illness for children in Africa*. London; 2006.
41. Save the Children UK: *An unnecessary evil? User fees for healthcare in low-income countries*. London; 2005.
42. World Vision: *Who's counting? 9.2 million children – the cost of inaction on child health*. Monrovia; 2009.
43. World Vision: *Child health now: Together we can end preventable deaths*. Monrovia; 2009.
44. Action for Global Health: *Achieving the health MDGs by 2015: What the EU needs to do!* Brussels; 2010.
45. Action for Global Health: *Action for Global Health recommendations for the Council Conclusions on the European Commission's Communication on the EU Role in Global Health*. Brussels; 2010.
46. Action for Global Health: *Improving the health of children across the world needs to be made a priority by governments*. Strasbourg; 2010.
47. Action for Global Health: *2010 reality check: Time is running out to meet the health MDGs*. Brussels; 2010.
48. Action for Global Health: *Dear member of the Development Cooperation Working Group*. Brussels; 2010.
49. Action Mondiale Contre la Pauvreté - France: *Health for development: Challenges and responsibilities: At the midway point in the Millennium development goals, where do we stand on health? The French civil society recommendations*. Paris; 2008.
50. Commission for Africa: *Our common interest: report of the Commission for Africa*. London; 2005.

51. Commission for Africa: *Still our common interest: commission for Africa report 2010*. London; 2010.
52. Coordination Sud: *Proposition des ONG françaises*. Paris; 2010.
53. Coordination Sud: *Préparation du G8 de Hokkaido, Toyako, Japon 7–9 Juillet 2008. Propositions des ONG françaises*. Paris; 2008.
54. Countdown to 2015: *Countdown to 2015 decade report (2000-2010): Taking stock of maternal, newborn and child survival*. Geneva; 2010.
55. G8: *G8 Hokkaido Toyako Summit Leaders Declaration*. Toyako; 2008.
56. G8: *Responsible leadership for a sustainable future*. L'Aquila; 2009.
57. Global Health Watch: *Global Health Watch 2005-2006: An alternative world health report*. London; 2006.
58. Joint United Nations Programme on HIV AIDS: *Countdown to zero: Global plan towards the elimination of new HIV infections among children by 2015 and keeping their mothers alive*. Geneva; 2011.
59. MDG Africa Steering Group: *Achieving the Millennium Development Goals in Africa*. New York; 2008.
60. People's Health Movement: *People's Charter for Health*. Cape Town; 2009.
61. Task Force on Global Action for Health System Strengthening: *Global action for health system strengthening: Policy recommendations to the G8*. Tokyo; 2009.
62. Taskforce on Innovative International Financing for Health Systems: *More money for health, and more health for the money*. Geneva; 2009.
63. The Global Campaign for the Health Millennium Development Goals: *Leading by example – Protecting the most vulnerable during the economic crisis*. Oslo; 2009.
64. UN Millennium Project: *Who's got the power? Transforming health systems for women and children. Achieving the Millennium Development Goals*. London; 2005.
65. UN Millennium Project: *Preparing national strategies to achieve the Millennium Development Goals: A handbook*. Washington; 2005.
